1 **Overlapping transmission of group A and C/G *Streptococcus* facilitates inter-species**  
2 **mobile genetic element exchange**

3

4 Ouli Xie<sup>1,2</sup>, Cameron Zachreson<sup>3</sup>, Gerry Tonkin-Hill<sup>4</sup>, David J Price<sup>1,5</sup>, Jake A Lacey<sup>1,6</sup>,  
5 Jacqueline M Morris<sup>6</sup>, Malcolm I McDonald<sup>7</sup>, Asha C Bowen<sup>8</sup>, Philip M Giffard<sup>9,10</sup>, Bart J  
6 Currie<sup>9,11</sup>, Jonathan R Carapetis<sup>8</sup>, Deborah C Holt<sup>9</sup>, Stephen D Bentley<sup>12</sup>, Mark R Davies<sup>6\*</sup>,  
7 Steven YC Tong<sup>1,13\*#</sup>

8

9 <sup>1</sup> Department of Infectious Diseases, University of Melbourne, at the Peter Doherty Institute  
10 for Infection and Immunity, Australia

11 <sup>2</sup> Monash Infectious Diseases, Monash Health, Australia

12 <sup>3</sup> School of Computing and Information Systems, University of Melbourne, Australia

13 <sup>4</sup> Department of Biostatistics, University of Oslo, Norway

14 <sup>5</sup> Centre for Epidemiology and Biostatistics, Melbourne School of Population and Global  
15 Health, University of Melbourne, Australia

16 <sup>6</sup> Department of Microbiology and Immunology, University of Melbourne, at the Peter Doherty  
17 Institute for Infection and Immunity, Australia

18 <sup>7</sup> Division of Tropical Health and Medicine, James Cook University, Australia

19 <sup>8</sup> Wesfarmers Centre for Vaccines and Infectious Diseases, Telethon Kids Institute, University  
20 of Western Australia and Perth Children's Hospital, Australia

21 <sup>9</sup> Global and Tropical Health Division, Menzies School of Health Research, Charles Darwin  
22 University, Australia

23 <sup>10</sup> Faculty of Health, Charles Darwin University, Australia

24 <sup>11</sup> Infectious Diseases Department, Royal Darwin Hospital, Australia

25 <sup>12</sup> Wellcome Sanger Institute, Wellcome Genome Campus, UK

**NOTE: This preprint reports new research that has not been certified by peer review and should not be used to guide clinical practice.**

26 <sup>13</sup> Victorian Infectious Diseases Service, The Royal Melbourne Hospital, at the Peter Doherty

27 Institute for Infection and Immunity, Australia

28

29 \* These authors contributed equally to the study

30

31 # Corresponding author:

32 Prof Steven Tong

33 The Peter Doherty Institute for Infection and Immunity

34 792 Elizabeth St, Melbourne, VIC, Australia, 3000

35 [steven.tong@mh.org.au](mailto:steven.tong@mh.org.au)

36 **Abstract**

37 *Streptococcus dysgalactiae* subspecies *equisimilis* (SDSE) and *Streptococcus pyogenes* share  
38 skin and throat niches with extensive genomic homology and horizontal gene transfer (HGT)  
39 possibly underlying shared disease phenotypes. It is unknown if cross-species transmission  
40 interaction occurs. We conducted a genomic analysis of a longitudinal household survey in  
41 remote Australian First Nations communities for patterns of cross-species transmission  
42 interaction and HGT. From 4,547 person-consultations, 294 SDSE and 315 *S. pyogenes* isolates  
43 were sequenced. SDSE and *S. pyogenes* transmission intersected extensively among  
44 households and the observed co-occurrence and transmission links were consistent with  
45 independent transmission without inter-species interference. At least one of three near-identical  
46 cross-species mobile genetic elements (MGEs) carrying antimicrobial resistance or  
47 streptodornase virulence genes was found in 55 (19%) SDSE and 23 (7%) *S. pyogenes* isolates.  
48 These findings demonstrate extensive co-circulation of both pathogens and HGT and support  
49 a need to integrate SDSE and *S. pyogenes* surveillance and control efforts.

## 50 Introduction

51 *Streptococcus dysgalactiae* subspecies *equisimilis* (SDSE, commonly group C/G  
52 *Streptococcus*) is closely related to the better-known human pathogen, *Streptococcus pyogenes*  
53 (group A *Streptococcus*). SDSE shares much the same ecological niche on the human skin and  
54 throat as *S. pyogenes* and the two pathogens exhibit overlapping disease manifestations such  
55 as pharyngitis and invasive disease including necrotising fasciitis and streptococcal toxic shock  
56 syndrome<sup>1</sup>. In regions with a high burden of beta-haemolytic streptococcal disease and post-  
57 infectious sequelae, there has been evidence that superficial SDSE infection may trigger  
58 immune responses which cross-react with cardiac myosin<sup>2, 3</sup>. These findings raise the  
59 possibility that SDSE may contribute to immune priming and the burden of rheumatic heart  
60 disease in those regions<sup>2</sup>. In high income regions, emerging evidence has also described crude  
61 rates of invasive SDSE disease comparable to, and in some jurisdictions, greater than *S.*  
62 *pyogenes*<sup>4-6</sup>.

63 Whole genome comparisons of SDSE and *S. pyogenes* demonstrate extensive genomic  
64 homology including shared virulence factors such as the multi-functional surface M protein  
65 and evidence of horizontal gene transfer (HGT), frequently involving mobile genetic elements  
66 (MGEs)<sup>7-9</sup>. These similarities may contribute to shared disease phenotypes. Many *S. pyogenes*  
67 vaccine candidates are present in both species with evidence of cross-species homologous  
68 recombination<sup>9</sup>.

69 Despite extensive genomic homology, there is *in vitro* evidence of possible cross-species  
70 competition. Strains of the two pathogens possess shared quorum sensing genes such as the *sil*  
71 locus with evidence of cross-species signalling<sup>10</sup>. Furthermore, anti-microbial peptides or  
72 bacteriocins such as SpbN/SpbM and the SDSE-specific Dysgalacticin, are found in some  
73 strains of SDSE and *S. pyogenes* with cross-species activity<sup>11, 12</sup>.

74 SDSE and *S. pyogenes* transmit by common pathways including respiratory droplets<sup>1</sup>.  
75 Recently, we have shown that asymptomatic *S. pyogenes* throat carriage is an important  
76 reservoir of transmission in high-endemic settings<sup>13</sup>. Transmission pathways of SDSE have not  
77 previously been described. Further, it is uncertain if in real-world studies transmission of one  
78 species competes with the other. In communities endemic for *S. pyogenes* infection with high  
79 rates of skin infection, rheumatic heart disease and invasive disease, the current focus is largely  
80 on *S. pyogenes* control through skin sore and scabies control programs, and vaccine  
81 development. Understanding the transmission interactions of SDSE and *S. pyogenes* and  
82 anticipating the potential impact of disease control measures on cross-species behaviour is  
83 important to inform the design of surveillance programs and infection control efforts.  
84 In this study, we examine the transmission of SDSE at a whole genome sequence (WGS)  
85 resolution using isolates collected in a household-based surveillance study over two years in  
86 two remote communities in the Northern Territory of Australia<sup>14</sup>. These transmission networks  
87 were compared to that of co-collected *S. pyogenes* isolates to assess for inter-species  
88 transmission interactions, and in the setting of co-circulation, their genomes were systemically  
89 examined for evidence of cross-species HGT of MGEs carrying key virulence and  
90 antimicrobial resistance genes.

91

## 92 **Results**

### 93 *Sampling and clinical epidemiology*

94 Two remote Aboriginal communities in the Northern Territory of Australia were prospectively  
95 followed for a two-year period between 2003–2005<sup>14, 15</sup>. Observations for one community  
96 (community 3) commenced in June 2004 as it replaced an initial community (community 2)  
97 with low recruitment. Communities 1 and 3 were included in this study.

98 Households (18 in community 1 and 20 in community 3) were visited approximately monthly  
99 allowing for access affected by weather and cultural events (Supplementary Figure 1). At each  
100 visit, throat swabs were taken regardless of symptoms and skin swabs were taken from  
101 impetigo lesions. From a total of 4,547 person-consultations during 486 household-visits, 1,087  
102 individuals (547 from community 1 and 540 from community 3) were sampled from which 330  
103 SDSE isolates (252 community 1 and 78 community 3) were recovered. Of the 330 isolates, 8  
104 were from skin and 322 from throat swabs of which only one case reported a sore throat. *S.*  
105 *pyogenes* was recovered on 327 occasions (218 community 1 and 109 community 3) with 208  
106 isolated from throat swabs and 119 from impetigo lesions. Detailed descriptions of the  
107 epidemiology of cases were described previously<sup>14, 15</sup>.

108 There was a high rate of individual mobility in and out of households with a median of 28  
109 people (range 6–57) enrolled per household over the study period. Each individual was  
110 observed at a median of 3 visits (range 1–19, intermittently sampled); and as such, duration of  
111 carriage in individuals could not be determined. Households were positive (i.e., at least one  
112 individual positive) for SDSE for a median of 56 days and then re-acquired SDSE a median of  
113 37 days later.

114

#### 115 *Whole genome sequencing reveals detailed transmission clusters*

116 From the 330 SDSE isolates, 294 (89%) were recovered for WGS. Using traditional  
117 epidemiological markers, *emm* type and multilocus sequence type (MLST), these isolates  
118 represented 19 *emm* types (23 *emm* subtypes), 21 MLSTs, and 26 *emm*-MLST combinations  
119 (Supplementary Table 1). Of these, 8/26 (31%) *emm*-MLST groups were found across both  
120 communities. Sequencing and analysis of 315/327 (96%) *S. pyogenes* isolates recovered from  
121 communities 1 and 3 for WGS were reported previously<sup>13</sup>.

122 To determine a WGS threshold for clustering of strains, we examined genomic variation of  
123 isolates of the same strain found longitudinally on multiple occasions from the same individual.  
124 Intra-host variation was used to predict longitudinal diversity of strains forming transmission  
125 chain as well as technical variations in single nucleotide polymorphism (SNP) calling. SDSE  
126 was found in 58 individuals on more than one occasion including three who were positive on  
127 five occasions, four on four occasions, 15 on three occasions and 36 on two occasions. Using  
128 *emm* and MLST as markers, 36 individuals had the same strain on more than one occasion  
129 including six individuals with the same isolate on three occasions, one individual on four  
130 occasions, and one on five occasions (Supplementary Figure 2). Pairwise SNP distances were  
131 calculated between these isolates and a threshold of <8 SNPs was determined for WGS  
132 transmission clustering (Supplementary Figure 3).

133 Phylogenetic reconstruction supported 18 distinct SDSE lineages/global genomic sequence  
134 clusters<sup>9</sup> present across both communities (Figure 1). High resolution genomic transmission  
135 clusters based on single linkage clustering at a SNP threshold of <8 and >99% shared gene  
136 content, revealed much finer detail than the traditional epidemiological markers (Figure 2). A  
137 total of 37 SDSE transmission clusters representing 237 (81%) isolates were inferred with an  
138 additional 57 singleton isolates (Supplementary Table 1). Transmission clusters were supported  
139 by core SNP phylogenies and presence-absence of virulence and/or antimicrobial resistance  
140 genes (Supplementary Figure 4a-c) with significant diversity within *emm* types (Figure 2) and  
141 evidence of mobile genetic element (MGE) gain/loss events carrying antimicrobial resistance  
142 and/or virulence factor genes among closely related isolates.

143 The two largest transmission clusters consisted of 32 isolates each and clusters with four or  
144 more isolates made up a total of 204 isolates (69%). Transmission clusters were present across  
145 a mean of 3 households (range 1–16). Despite the finding of eight *emm*-MLST groups across  
146 both communities, the WGS analysis indicated that only a single transmission cluster spanned

147 both communities. The upper limit of the pairwise SNP distance between isolates of the same  
148 transmission cluster was 16 SNPs (median 4) compared to 791 SNPs (median 20) within the  
149 same MLST, 5491 SNPs (median 25) within the same *emm* type, 638 SNPs (median 19) within  
150 the same *emm*-MLST combination, and 1505 SNPs (median 21) within the same genomic  
151 sequence cluster (Supplementary Figure 5), highlighting the limitations of other markers in  
152 determining recent transmission clusters.

153 There was no clear pattern of *emm* type replacement of SDSE isolates over time in the two  
154 communities in contrast to sequential replacement of *S. pyogenes emm* types as reported  
155 previously<sup>13, 14</sup>. Consistent with this finding, SDSE transmission clusters persisted for longer  
156 in the two communities (median of 349 days, 95% CI 189-440 days) compared to *S. pyogenes*  
157 (median of 241 days, 95% CI 181-259 days, log-rank  $p = 0.009$ ) (Supplementary Figure 6).

158

#### 159 *Network analysis supports independent transmission dynamics for SDSE and S. pyogenes*

160 SDSE transmission between households within each community was modelled by inferring  
161 links between isolates of the same transmission cluster detected at successive community visits  
162 (transmission window 12-44 days), including intra-household transmission events. Individuals  
163 were grouped by household which formed the nodes of the transmission work. Analysis of the  
164 transmission network revealed 123 SDSE putative transmission edges (events) in community  
165 1 and 14 edges in community 3, which had a shorter duration of sampling and fewer isolates  
166 detected (Table 1). All but one transmission edge was attributed to isolates from throat swabs  
167 for SDSE in contrast to 50/173 (29%) edges attributed to a predicted skin source for *S.*  
168 *pyogenes*.

169 To test the hypothesis that transmission of SDSE or *S. pyogenes* may interfere with  
170 transmission of the other species, the overlap between inferred transmission networks of the  
171 two species was compared to a null model in which any cross-species interaction was removed.



172 “Transmission overlap” was defined as the proportion of inferred SDSE transmission edges  
173 that corresponded to an inferred transmission of *S. pyogenes*. An overlapping edge  
174 corresponded to transmission of both SDSE and *S. pyogenes* which occurred between the same  
175 pair of households within the same transmission window without distinguishing which  
176 household acted as source. To generate a null model of transmission overlap, household labels  
177 in the inferred SDSE transmission network were randomised while preserving the *S. pyogenes*  
178 network. This process preserves important structural features of the SDSE network including  
179 degree distribution, and any clustering of SDSE transmission between households, while  
180 removing any direct cross-species effects related to the transmission of *S. pyogenes*.

181 Overlaying the transmission networks of the two species found a highly interconnected  
182 network with 11 shared transmission edges – nine in community 1 and two in community 3  
183 (Figure 3). The number of shared edges in each community was consistent with the distribution  
184 under the null model providing no evidence of inter-species transmission interference (one-  
185 sided p-value  $\leq$  observed value for community 1 = 0.75, community 3 = 0.94) (Supplementary  
186 Figure 7a, c). Results were similar when restricting the analysis to isolates only from throat  
187 swabs (Supplementary Figure 7b, d). These results indicate no evidence of an interaction  
188 between the two species in their household transmission patterns.

189 Although only 11/137 (8%) of total SDSE transmission edges were shared with *S. pyogenes*,  
190 the combined transmission networks demonstrated extensive crossover of the two organisms  
191 at the household level — SDSE and *S. pyogenes* co-occurred in the same household on 100/486  
192 (21%) of household-visits (Figure 4). To infer a null model of co-occurrence of SDSE and *S.*  
193 *pyogenes* in households while removing cross-species transmission effects, SDSE and *S.*  
194 *pyogenes* positive swabs were randomised across all swabs at each community visit. To account  
195 for grouping of isolates within households, isolates from the same transmission cluster were  
196 collapsed to a single positive result during the same household-visit. The observed co-

197 occurrence of SDSE and *S. pyogenes* within households was consistent with the model of  
198 independent inter-species transmission without evidence of interference (one-sided p-value  $\leq$   
199 observed value across both communities = 0.62). Results from a sensitivity analysis limited to  
200 isolates from throat swabs were consistent (Supplementary Figure 8a, b).

201

### 202 *Co-occurrence of SDSE and S. pyogenes facilitates shared mobile genetic elements*

203 We have previously demonstrated extensive genomic overlap between SDSE and *S. pyogenes*  
204 in the context of global genome databases<sup>9</sup>. In the setting of extensive household co-occurrence  
205 of the two species, we sought to find evidence of shared MGEs between the two species. Using  
206 a pangenome synteny-based approach, MGEs were systemically extracted from both SDSE  
207 and *S. pyogenes* isolates and examined for elements with >99% nucleotide identity across  
208 species<sup>9, 16</sup>.

209 Three near identical MGEs were found to be present in SDSE and *S. pyogenes* with variable  
210 presence across closely related isolates with as few as 0-11 core SNPs, suggestive of recent  
211 MGE gain/loss events within each of these strains (Figure 5a). A 53kbp prophage,  $\phi$ 1207.3<sup>17</sup>,  
212 carrying *mef(A)/msr(D)* macrolide efflux resistance genes was carried at a conserved cross-  
213 species genomic location (between SDEG\_RS07105 and SDEG\_RS07110 in reference  
214 genome GGS\_124 NC\_012891.1) and was present in 5 *S. pyogenes* and 31 SDSE isolates  
215 (Figure 5b). A second prophage,  $\phi$ MGAS5005.3 carrying the streptodornase gene *sda1*,  
216 previously described to be shared across species, was also found in a cross-species conserved  
217 insertion region<sup>9</sup>. An 18kbp integrative conjugative element (ICE)-like segment carrying the  
218 tetracycline resistance gene, *tet(M)*, was present in four *S. pyogenes* and eight SDSE isolates  
219 at three distinct insertion regions (Figure 5c, Supplementary Figure 9). At least one of these  
220 MGEs which carried antimicrobial resistance-associated genes or virulence-encoding genes,  
221 was found in 55 (19%) of SDSE and 23 (7%) of *S. pyogenes* isolates. SDSE isolates carrying

222 these shared MGEs were found across both communities while *S. pyogenes* isolates carrying  
223 shared MGEs were restricted to single communities (community 1 for  $\phi$ 1207.3, community 3  
224 for  $\phi$ MGAS5005.3 and the ICE-like element).

225 While directionality of MGE movement could not be inferred, including distinguishing  
226 between inter-species versus intra-species dissemination, the presence of near-identical  
227 elements at conserved insertion regions, suggests that overlapping transmission may facilitate  
228 shared MGEs from a common pool. The carriage of these MGEs across multiple distinct  
229 lineages suggests that these shared MGEs may lead to dissemination of antimicrobial resistance  
230 and virulence-associated genes.

## 231 232 **Discussion**

233 Using WGS-level resolution, we were able to reconstruct SDSE household transmission  
234 networks and compare it to co-collected *S. pyogenes* isolates, demonstrating extensive co-  
235 circulation. Despite occupying similar niches on the skin and throat, we show that the two  
236 organisms transmit independently without evidence of interference at the household level. In  
237 the setting of extensive transmission cross-over in households, we find multiple MGEs present  
238 across both populations carrying antimicrobial resistance or virulence factor genes with  
239 evidence suggestive of recent gain/loss events. This analysis of a dataset of densely co-sampled  
240 SDSE and *S. pyogenes* isolates provides a level of transmission detail and examination of real-  
241 world inter-species transmission dynamics and horizontal gene transfer which to our  
242 knowledge, has not previously been described for beta-haemolytic streptococci.

243 SDSE is increasingly being recognised as an important cause of invasive human disease with  
244 recent studies suggesting incidence and mortality comparable to *S. pyogenes*<sup>4-6</sup>. While not  
245 traditionally considered as a cause of acute rheumatic fever/rheumatic heart disease  
246 (ARF/RHD), reports from northern Australia suggest that at least in high-incidence areas of  
247 ARF/RHD, SDSE throat carriage may have the potential to induce cardiac myosin cross-

248 reactive antibodies mimicking that seen with *S. pyogenes*<sup>2,3</sup>. Therefore, the finding of extensive  
249 throat transmission of SDSE, including persistence of transmission clusters longer than that of  
250 *S. pyogenes*, underscores a need to further understand its contribution to immune priming for  
251 ARF/RHD which in turn has important disease control implications.

252 Additionally, interactions between SDSE and *S. pyogenes* such as horizontal gene transfer and  
253 homologous recombination are key drivers in bacterial population dynamics, and may  
254 influence *S. pyogenes* and SDSE biology<sup>9</sup>. Notably, genes encoding antigens currently under  
255 investigation as *S. pyogenes* vaccine candidates are frequently also found in SDSE<sup>9</sup>. Our  
256 findings of extensive household co-occurrence may provide an opportunity for HGT which we  
257 demonstrate in the setting of shared MGEs. We show three near-identical MGEs were present  
258 across different lineages in SDSE and *S. pyogenes* including presence and absence in closely  
259 related isolates suggestive of recent gain/loss events. These MGEs carried antimicrobial  
260 resistance and virulence genes such as the macrolide efflux genes *mef(A)/msr(D)*, tetracycline  
261 resistance *tet(M)*, and the streptodornase gene *sdal*. While we cannot infer directionality of  
262 HGT of MGEs across species compared to intra-species dissemination or acquisition from an  
263 intermediary species, at least one of these MGEs was present in 55 (19%) of SDSE and 23  
264 (7%) of *S. pyogenes* isolates. This underscores the importance of integrating SDSE with *S.*  
265 *pyogenes* surveillance as we seek to improve our understanding of transmission and disease  
266 pathogenesis of the two organisms and as efforts move towards a possible *S. pyogenes* vaccine  
267 which may introduce selection pressures across both organisms.

268 SDSE and *S. pyogenes* occupy similar ecological niches in the throat and on the skin with  
269 overlapping disease manifestations such as pharyngitis. Cross-species interaction and  
270 competition has been demonstrated such as the expression of bacteriocins which are able to  
271 inhibit the other species and cross-species quorum sensing involving the two-component  
272 regulator, *silAB* with its signalling peptide *silCR*<sup>10-12</sup>. However, the *sil* locus and characterised

273 bacteriocins such as Dysgalacticin and SpbN/SpbM are variably present in SDSE and *S.*  
274 *pyogenes* and it is unclear if *in vitro* interactions translate to real-world transmission dynamics.  
275 Our data demonstrate that despite evidence of possible *in vitro* interference, SDSE and *S.*  
276 *pyogenes* appear to transmit independently with highly interconnected household transmission  
277 networks in a high burden setting.

278 SDSE was almost exclusively isolated from the throat in this study<sup>14</sup>. The mechanism behind  
279 the predilection for the throat for SDSE in comparison to the wider presence of *S. pyogenes*  
280 across throat and impetigo lesions is unclear. As described previously, the age of individuals  
281 included in this study with SDSE was not different to those with *S. pyogenes* with the highest  
282 rates in 5-14 year-olds and does not explain the throat predominance of SDSE<sup>14, 15</sup>. Despite the  
283 genomic similarities between SDSE and *S. pyogenes*, their virulence repertoires differ  
284 including carriage of the cysteine proteinase SpeB which is exclusively present in *S. pyogenes*.  
285 Experimental evidence suggests that SpeB activity may be important in establishing skin  
286 infection for *S. pyogenes*<sup>18</sup>. Cross-species genotype-phenotype associations could not be drawn  
287 from this study due to the near perfect separation between skin and throat sites for SDSE.  
288 However, sensitivity analyses restricting cross-species transmission analyses to throat isolates  
289 were concordant with the primary analysis without any evidence of cross-species interference.

290 Despite evidence of independent transmission at a household level, with household co-  
291 occurrence of SDSE and *S. pyogenes* on 100/486 (21%) of household-visits, the frequency of  
292 presence of SDSE and *S. pyogenes* in the same swab is unclear. SDSE and *S. pyogenes* are both  
293 large colony, beta-haemolytic streptococci and are generally indistinguishable by colony  
294 morphology. Given only representative colonies were characterised in this study, the frequency  
295 of co-colonisation of SDSE and *S. pyogenes* in the same individual could not be estimated. In  
296 fact, this is a common limitation of carriage studies to date seeking to determine the prevalence  
297 of SDSE and *S. pyogenes* from throat swabs<sup>19-21</sup>. Given our findings of household-level

298 transmission dynamics, future studies should consider methods such as WGS from plate  
299 sweeps or deep sequencing of swabs to determine co-occurrence in individuals. These methods  
300 have also previously been shown to improve resolution of intra-host diversity and  
301 reconstructing transmission and may offer greater insight into cross-species transmission  
302 dynamics<sup>22</sup>.

303 Our study has some limitations. This study was carried out in a remote and tropical setting in  
304 northern Australia in Aboriginal communities with a high burden of *S. pyogenes* disease  
305 including impetigo, ARF/RHD and invasive disease. Therefore, transmission dynamics and co-  
306 occurrence of the two organisms may differ in other settings. There was a high level of  
307 population mobility in and out of households in these communities and thus individual level  
308 transmission dynamics and duration of carriage could not be determined due to limited  
309 longitudinal sampling of most individuals. Additionally, while SDSE was only found from 8  
310 impetigo/skin sore swabs, intact skin was not sampled. Therefore, it is unclear if SDSE on  
311 healthy skin may contribute to transmission.

312 In summary, this study demonstrates important transmission dynamics of SDSE and *S.*  
313 *pyogenes*. The two closely related pathogens frequently co-occur within households with  
314 interconnected transmission networks, but without evidence of inter-species interference across  
315 households. Transmission overlap and shared niches, particularly in the human throat, may  
316 facilitate interspecies gene flow including clinically important determinants such as  
317 antimicrobial resistance genes. These findings emphasise a need to further understand the  
318 interactions between these pathogens including in the context of ARF/RHD in high burden  
319 regions. The immunopathogenesis of ARF remains poorly understood despite many decades of  
320 research and the specific events antecedent to each episode of ARF are elusive with respect to  
321 the role of *S. pyogenes* in skin lesions and SDSE in the throat. As interventions targeting *S.*  
322 *pyogenes* take place, it is possible that SDSE may also be affected. That impact could

323 potentially be a reduction in SDSE disease (e.g., by vaccines that may target common antigens)  
324 or conversely by SDSE filling an ecological niche if *S. pyogenes* infection or carriage is  
325 selectively targeted (e.g., in primary care interventions that expand the use of *S. pyogenes* rapid  
326 diagnostics for throat swabs). Incorporating research, surveillance and control efforts of SDSE  
327 with *S. pyogenes* will improve the understanding of both pathogens individually and cross-  
328 species interactions in relation to clinical disease burden, disease phenotypes, and future  
329 response to vaccine interventions.

330

## 331 **Methods**

### 332 *Isolate collection and culture*

333 Isolates were collected from a previously reported prospective surveillance study in three  
334 remote Aboriginal communities in remote Northern Territory, Australia, which were visited  
335 approximately monthly over a two-year period from August 2003 to June 2005<sup>14</sup>. Due to  
336 waning community support and logistical difficulties in community 2, it was replaced with  
337 another community in June 2004 (community 3). Only communities 1 and 3 were included in  
338 this study. At each visit, researchers collected throat swabs regardless of symptoms from  
339 participants and examined for skin sores both purulent and dry, which were also swabbed. Due  
340 to high population mobility, individuals were identified as part of households for analyses,  
341 including family groups residing in one or two adjacent houses.

342 Swabs were inoculated onto horse blood agar and selective media containing colistin and  
343 nalidixic acid and transported for culture at a central laboratory in Darwin, Australia. Plates  
344 were incubated at 37°C in 5% CO<sub>2</sub> and examined after 24 and 48 hours. A single representative  
345 colony was selected for typing (Streptococcal Grouping Kit, Oxoid Diagnostic Reagents)  
346 unless significant differences in colony morphology and/or haemolysis intensity was observed,  
347 in which case additional colonies were also selected.



348 The current study received ethics approval from the Human Research Ethics Committee of the  
349 Northern Territory Department of Health and Menzies School of Health Research (approval  
350 2015-2516).

351

352 *Whole genome sequencing and typing*

353 Lancefield group C/G streptococcal isolates were retrieved from stored glycerol stocks kept at  
354 -70°C. Microbial DNA was extracted and 150bp paired-end libraries were prepared using the  
355 Illumina TruSeq prep kit. Sequencing was performed using the Illumina HiSeq X Ten platform  
356 (The Wellcome Trust Sanger Institute, United Kingdom). Fifty-four SDSE sequences were  
357 previously published by Xie et al.<sup>9</sup> *S. pyogenes* sequences were previously described by Lacey  
358 et al.<sup>13</sup> and available under Bioproject PRJNA879913.

359 Reads from Lancefield group C/G streptococcal isolates were checked for contamination using  
360 Kraken2 v2.1.2.<sup>23</sup> Any sequences with >5% reads assigned to a species other than SDSE, with  
361 the exception of *S. pyogenes*, was excluded. Genomes were assembled using a previously  
362 described pipeline<sup>9</sup>.

363 *In silico* typing of the hypervariable N-terminal domain of the *emm* gene was performed using  
364 emmtyper v0.2.0 (<https://github.com/MDU-PHL/emmtyper>) and MLST assigned using MLST  
365 v2.22.0 (<https://github.com/tseemann/mlst>)<sup>24</sup>. Genomic sequence clusters, representative of  
366 global SDSE populations, were assigned using PopPUNK v.2.60 with a scheme available at  
367 <https://www.bacpop.org/poppunk/> (v1)<sup>9, 25</sup>. Antimicrobial resistance and virulence genes were  
368 inferred as previously described<sup>9</sup>. Genome metadata is available in Supplementary Table 1. *S.*  
369 *pyogenes* genomic sequences clusters were assigned with a scheme available at  
370 <https://poppunk.net/pages/databases.html><sup>26</sup>.

371 The pangenomes for SDSE and *S. pyogenes* were constructed using Panaroo v1.2.10<sup>27</sup> in ‘strict’  
372 mode with initial clustering at 98% length and sequence identity followed by a family threshold



373 of 70%. Core genes were defined as genes present in  $\geq 99\%$  of genomes. Pangenome gene  
374 synteny was mapped using Corekaburra v0.0.5<sup>28</sup>.

375 Maximum likelihood phylogenetic trees for SDSE and *S. pyogenes* isolates were inferred using  
376 IQ-tree v2.0.6 with a GTR+F+G4 model and 1000 UFBoot replicates<sup>29, 30</sup>. Alignments for  
377 SDSE were generated using Snippy v4.6.0 (<https://github.com/tseemann/snippy>) against  
378 reference genome GGS\_124 (NC\_012891.1) and *S. pyogenes* against reference genome  
379 MGAS5005 (NC\_007297.2) with MGE regions masked. Recombination was not masked.  
380 Maximum parsimony trees were inferred within genomic sequence clusters to validate  
381 predicted transmission clusters using phangorn v2.10.0 and SNP alignments generated by split  
382 kmer analysis (SKA v1.0)<sup>31, 32</sup>.

383

#### 384 *MGE comparison*

385 MGEs were systemically extracted from SDSE and *S. pyogenes* genomes using a pangenome  
386 synteny based approach based on proMGE and as previously described<sup>9, 16</sup>. The pipeline was  
387 modified to extract nucleotide sequences of accessory genomic segments classified as MGEs.  
388 Sequences from SDSE and *S. pyogenes* were initially clustered using CD-HIT<sup>33</sup> v4.8.1 with a  
389 sequence identity threshold 0.8 and length difference cut-off 0.8. Clusters with sequences from  
390 both species were inspected and pairwise alignments generated using minimap2 v2.24<sup>34</sup>.

391

#### 392 *Transmission clustering*

393 Transmission clusters representing isolates predicted to have formed a recent transmission  
394 chain based on WGS data was determined using a SNP threshold of  $< 8$  and  $> 99\%$  shared gene  
395 content. A SNP threshold of  $< 8$  was determined using the maximal SNP distance between  
396 isolates of the same *emm* and MLST isolated within the same individual, a surrogate for SNP

397 diversity within a single infecting strain. A gene content threshold of >99% determined from  
398 pangenome analysis was chosen to capture MGE gain/loss events.

399 Pairwise SNP distance between isolates within the same genomic sequence cluster was  
400 performed using SKA v1.0<sup>31</sup> from reads using the ‘fastq’ command with default coverage cut-  
401 off 4, minimum minor allele frequency 0.2, minimum base quality 20 and kmer size 15. Single  
402 linkage clustering with a SNP distance of <8 was calculated using the ‘distance’ command.  
403 SKA requires exact kmer matches in order to detect SNPs between the flanking/split kmers and  
404 therefore may miss SNPs between more divergent sequences. The 150bp hypervariable N-  
405 terminal region of the *emm* gene poses such a challenge and has previously been shown to be  
406 able to undergo recombination. As such, isolates clustered by SKA were checked for matching  
407 *emm* types. In the case of different *emm* subtypes, alignments of the hypervariable region *emm*  
408 region were manually inspected to determine the number of SNPs. Finally, a pangenome  
409 comparison and single linkage clustering within each SKA cluster at 20 genes (approximates  
410 99% gene similarity) was performed to generate the final transmission clusters.

411 Transmission cluster persistence was calculated by Kaplan-Meier estimation from time of first  
412 detection of a transmission cluster in a community to the first visit where the transmission  
413 cluster was not detected without subsequence re-appearance. The difference between SDSE  
414 and *S. pyogenes* was calculated by Cox Proportional Hazards as implemented in survival v3.4.0  
415 and survminer v0.4.9.

416

#### 417 *Household transmission network*

418 Transmission networks between households in each community were inferred using a modified  
419 version of the model described by Lacey *et al.*<sup>13</sup> and the R packages igraph v1.3.5 for network  
420 analysis, and ggraph v2.1.0, and scatterpie v0.1.8 for visualisation. Networks were initially  
421 inferred for SDSE and *S. pyogenes* separately. Transmission clusters predicted using WGS

422 were mapped against epidemiological metadata to generate adjacency matrices from which  
423 transmission networks were inferred. Each household was represented by a node within the  
424 transmission network and unweighted edges (transmission events or links) were drawn  
425 between households, or within the same household, when unique individuals carried isolates  
426 from the same transmission cluster across successive community visits (transmission window  
427 between 12 to 44 days). Isolates could be linked to multiple other isolates within the same  
428 transmission cluster and respective transmission window. The isolate detected at the earlier  
429 community visit/time point was denoted as putative source for the purposes of predicting the  
430 contribution of throat and skin carriage/infection to transmission. Edges were drawn for each  
431 transmission window and assigned to the latter, ‘recipient’, community visit. As households  
432 were sampled in order over a short window (range 1–4 days) within each community visit,  
433 transmission edges were not inferred within the same community visit given the uncertainty in  
434 predicting a source.

435 To determine transmission overlap between SDSE and *S. pyogenes*, the intersection between  
436 the transmission networks for SDSE ( $G_{sdse}$ ) and *S. pyogenes* ( $G_{pyo}$ ) at each transmission  
437 window ( $w$ ) was taken. Here, households were nodes and with undirected edges ( $E$ ) drawn if  
438 they were linked by a transmission event. The percentage of shared edges ( $f$ ) was calculated  
439 as:

$$440 \quad f = \frac{\sum_{w=1}^n |(E_{sdse,w} \cap E_{pyo,w})|}{\sum_{w=1}^n |(E_{sdse,w} \cup E_{pyo,w})|} \times 100$$

441

#### 442 *Models of independent transmission*

443 A null model of independent transmission was generated for the SDSE and *S. pyogenes*  
444 transmission networks by node-label permutation. The household labels of the transmission  
445 adjacency matrix generated from the observed SDSE data were permuted over 10,000 iterations

446 and compared to the *S. pyogenes* transmission network inferred from observed data as  
447 described above. The number of overlapping edges at each transmission window was  
448 calculated, summed for each iteration, and compared to the observed number of shared  
449 transmission edges. A one-sided p-value testing the hypothesis of SDSE and *S. pyogenes*  
450 transmission interference was calculated by the proportion of permutations with shared edges  
451  $\leq$  observed shared edges.

452 A model of independent inter- and intra-species transmission for household co-occurrence was  
453 generated by permutation of positive SDSE and *S. pyogenes* swabs across individuals and  
454 households within each community visit while accounting for grouping of isolates from the  
455 same transmission cluster within households. Sequenced isolates from the same transmission  
456 cluster and household-visit (159/609 SDSE and *S. pyogenes* combined, 26%) were collapsed  
457 into a single positive result (159 collapsed to 69 positive swabs). Positive SDSE and *S.*  
458 *pyogenes* swabs at each community visit were then permuted across all individuals sampled at  
459 that respective community visit. A co-occurrence within a household was counted when SDSE  
460 and *S. pyogenes* were present simultaneously in individuals in a household regardless if they  
461 were from the same individual or across multiple individuals. After 10,000 iterations, a one-  
462 sided p-value testing the hypothesis of SDSE and *S. pyogenes* transmission interference at a  
463 household level was calculated by the proportion of permutations with co-occurrences  $\leq$   
464 observed co-occurrences.

465

#### 466 *Data availability*

467 Accessions for newly sequenced SDSE isolates are listed in Supplementary Table 1 under the  
468 BioProject identifier PRJEB35476.

469

#### 470 *Code availability*

471 Scripts used to generate the transmission networks and null models are available at  
472 [https://github.com/OuliXie/SDSE\\_transmission](https://github.com/OuliXie/SDSE_transmission). Scripts for MGE extraction and classification  
473 from the pangenome are updated from that described previously<sup>9</sup> and are available at  
474 [https://github.com/OuliXie/Strep\\_MGE\\_pipeline](https://github.com/OuliXie/Strep_MGE_pipeline).

475

## 476 **Acknowledgements**

477 We thank the participants, communities, councils, Aboriginal research officers and health  
478 centres for their involvement in the original surveillance study. We thank Ross M. Andrews for  
479 his role in the original surveillance study. We acknowledge the assistance of the sequencing  
480 and pathogen informatics core teams at the Wellcome Sanger Institute, UK where this work  
481 was supported by the Wellcome Trust core grants 206194 and 108413/A/15/D. OX was  
482 supported by the Australian Health and Medical Research Council (NHMRC) postgraduate  
483 scholarship (GNT2013831) and Avant Foundation Doctors in Training Research Scholarship  
484 (2021/000017). MRD was supported by a University of Melbourne CR Roper Fellowship.

485

## 486 **Contributions**

487 OX worked on study design, analysis, data interpretation and manuscript preparation. MRD  
488 and SYCT contributed to conception of the project and data interpretation. CZ, GTH, DJP and  
489 JAL contributed to transmission model design and data interpretation. JMM, MIM, ACB,  
490 PMG, BJC, JRC, and DCH contributed to data collection and curation. SDB contributed to  
491 genomic sequencing. All authors contributed to manuscript preparation and review.

492 **Table 1.** Number of inferred unweighted transmission edges between households at successive  
493 community visits in two remote communities.

|                                      | <b>Household</b>                                                       |                      | <b>Community</b>    |                      | <b>Total</b> |
|--------------------------------------|------------------------------------------------------------------------|----------------------|---------------------|----------------------|--------------|
|                                      | <b>All isolates</b>                                                    | <b>Throat source</b> | <b>All isolates</b> | <b>Throat source</b> |              |
|                                      | <b><i>Streptococcus dysgalactiae</i> subspecies <i>equisimilis</i></b> |                      |                     |                      |              |
| Community 1                          | 22 (18%)                                                               | 22 (18%)             | 101 (82%)           | 100 (81%)            | 123          |
| Community 3                          | 3 (21%)                                                                | 3 (21%)              | 11 (79%)            | 11 (79%)             | 14           |
| <b><i>Streptococcus pyogenes</i></b> |                                                                        |                      |                     |                      |              |
|                                      | <b>All isolates</b>                                                    | <b>Throat source</b> | <b>All isolates</b> | <b>Throat source</b> | <b>Total</b> |
| Community 1                          | 15 (11%)                                                               | 9 (7%)               | 116 (89%)           | 75 (57%)             | 131          |
| Community 3                          | 4 (10%)                                                                | 3 (7%)               | 38 (90%)            | 36 (86%)             | 42           |

494

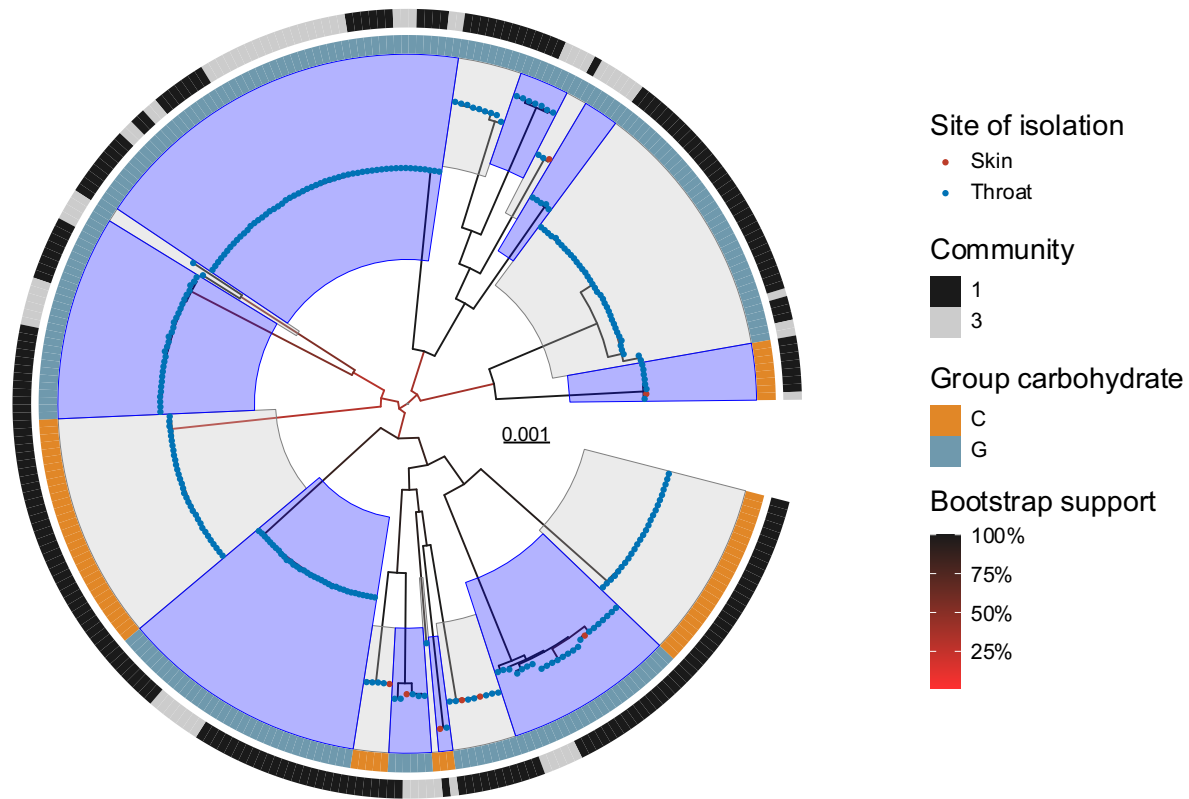

495

496 **Figure 1.** Maximum-likelihood phylogeny of 294 *Streptococcus dysgalactiae* subsp.  
497 *equisimilis* (SDSE) isolates. Sequences were aligned against SDSE reference genome  
498 GGS\_124 (NC\_012891.1) with mobile genetic element regions masked. Distinct genomic  
499 sequence clusters determined by PopPUNK<sup>25</sup> as previously defined by a global SDSE dataset<sup>9</sup>,  
500 are denoted by alternating blue and grey highlights from internal nodes. Site of isolation is  
501 coloured by blue (throat) and red (skin) tips. The inner ring denotes the Lancefield group  
502 carbohydrate and the outer ring the community of isolation. Bootstrap supports are shown as  
503 branch colour gradients and were calculated using the ultrafast bootstrap approximation  
504 demonstrating some uncertainty in deep branches of the phylogeny<sup>30</sup>.

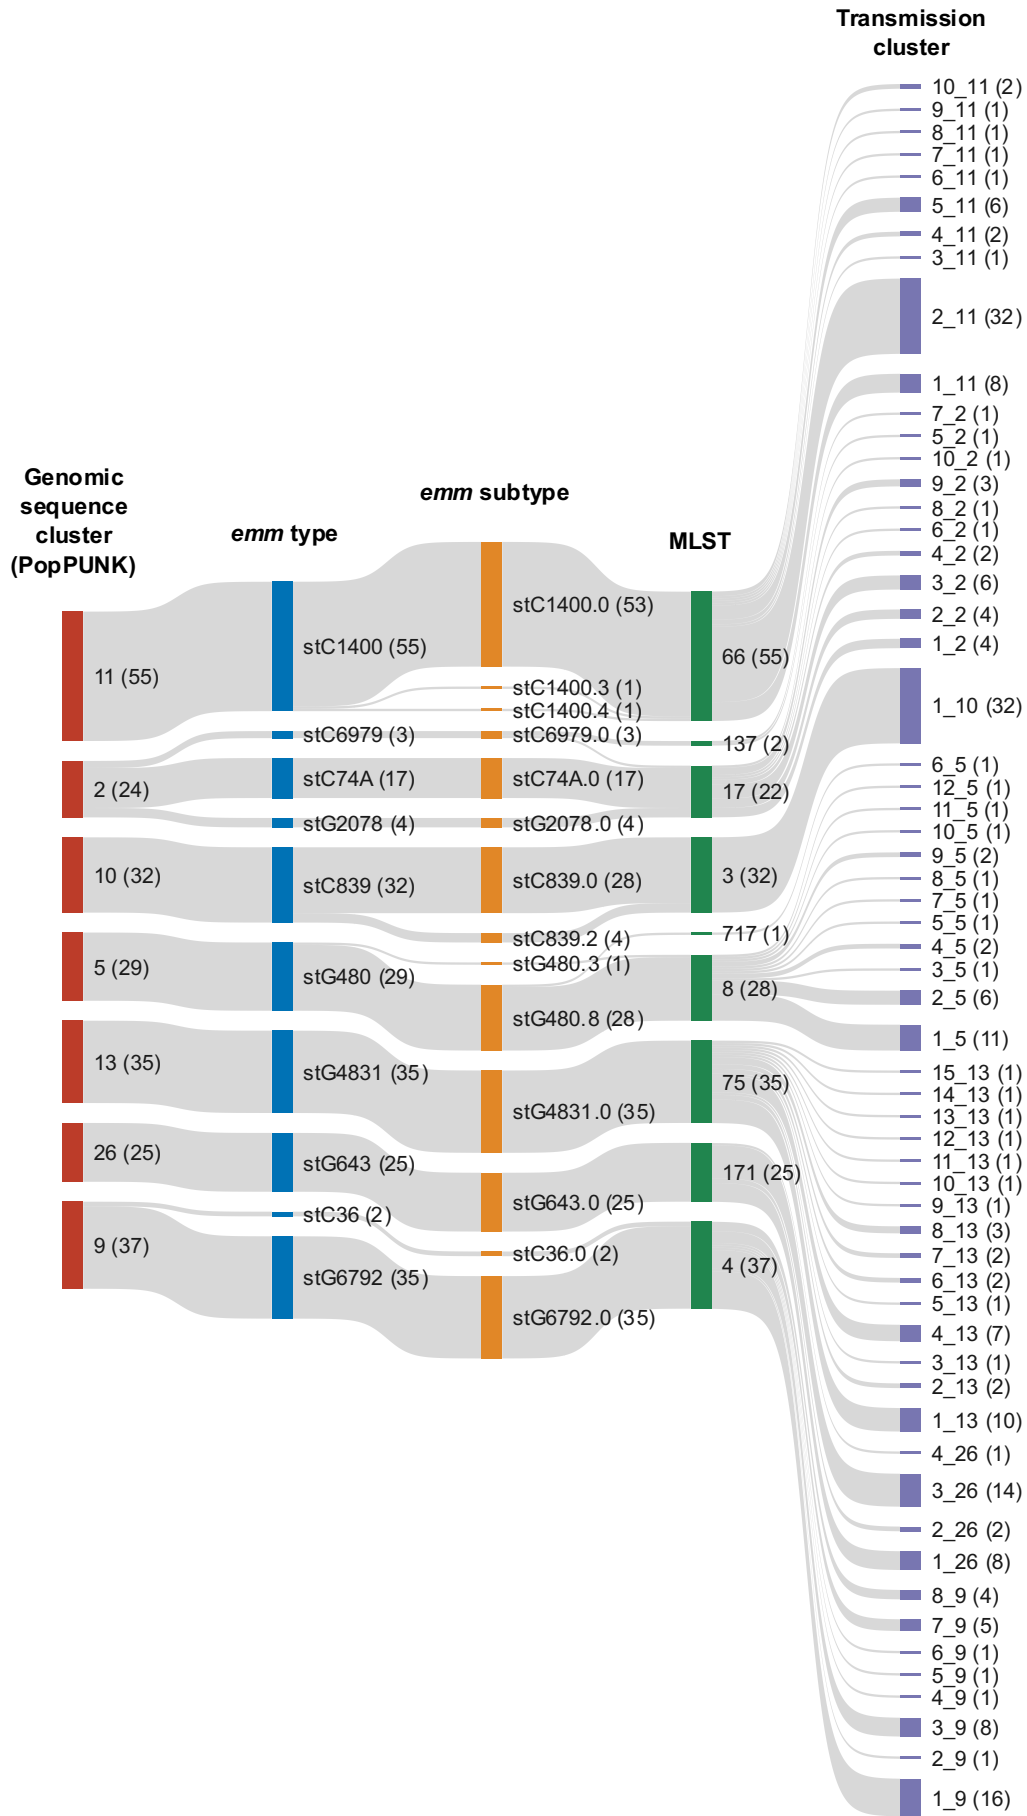



506 **Figure 2.** Alluvial plot of the relationship between the largest 7/18 *Streptococcus dysgalactiae*  
507 subspecies *equisimilis* (SDSE) genomic sequence clusters (representing 237/294 isolates) as  
508 determined by PopPUNK against *emm* type, *emm* subtype, multilocus sequence type (MLST)  
509 and transmission clusters determined using single linkage clustering at a SNP threshold of <8  
510 and >99% shared gene content. The number of isolates in each category is denoted within  
511 brackets. From 10 *emm* types (14 *emm* subtypes) and 9 MLSTs shown, 60 transmission clusters  
512 were determined. Traditional markers such as *emm* subtype in some cases over-split SDSE  
513 clusters as demonstrated by *stC839.0* and *stC839.2* which differ by only one SNP within their  
514 hypervariable *emm* region and otherwise fall within the same transmission cluster.

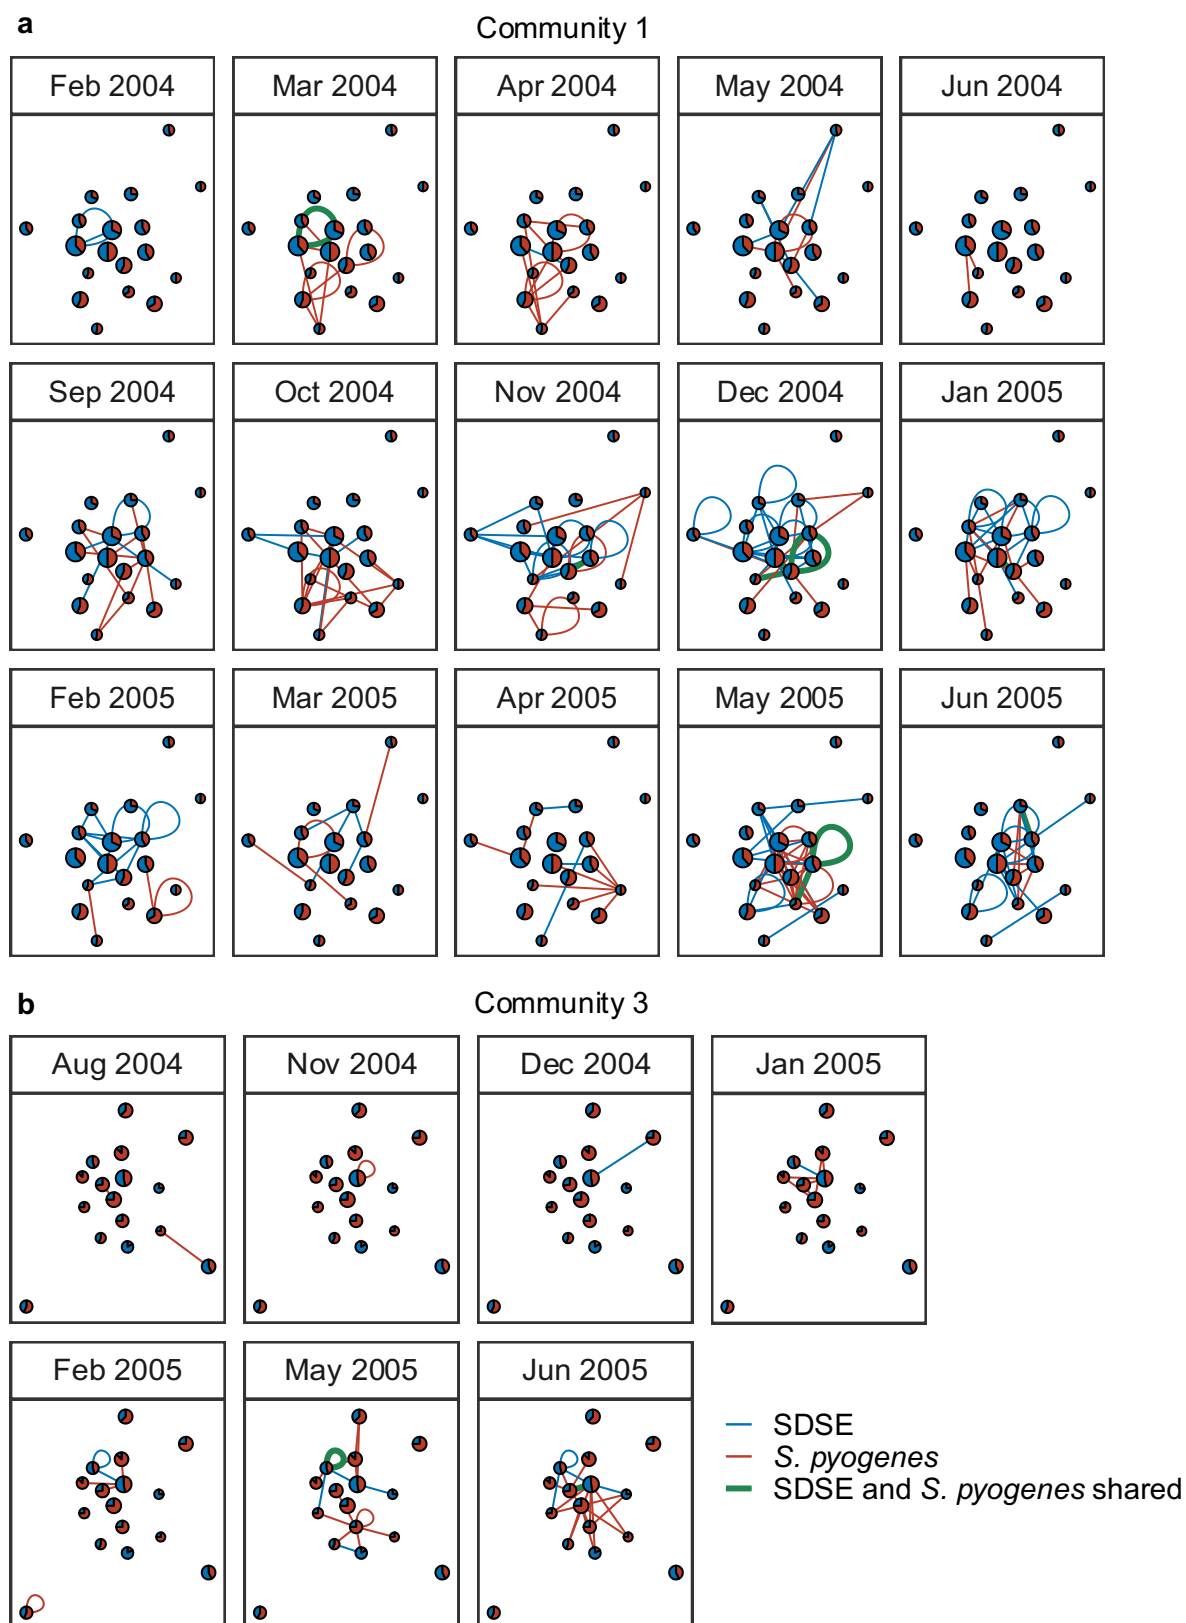

515

516 **Figure 3.** Transmission links between households across consecutive community visits in

517 community 1 a), and community 3 b). Households are represented by nodes proportional in

518 size to the number of participants enrolled at each household and coloured by the proportion  
519 of *S. pyogenes* (red) and *S. dysgalactiae* subsp. *dysgalactiae* (SDSE, blue) isolates detected in  
520 the household across the entire study period. Transmission links are represented by undirected  
521 and unweighted edges between households and coloured by species with shared edges  
522 highlighted in green. Loops correspond to predicted transmission edges between unique  
523 individuals within the same household. Only community visits where transmission edges were  
524 predicted are shown.

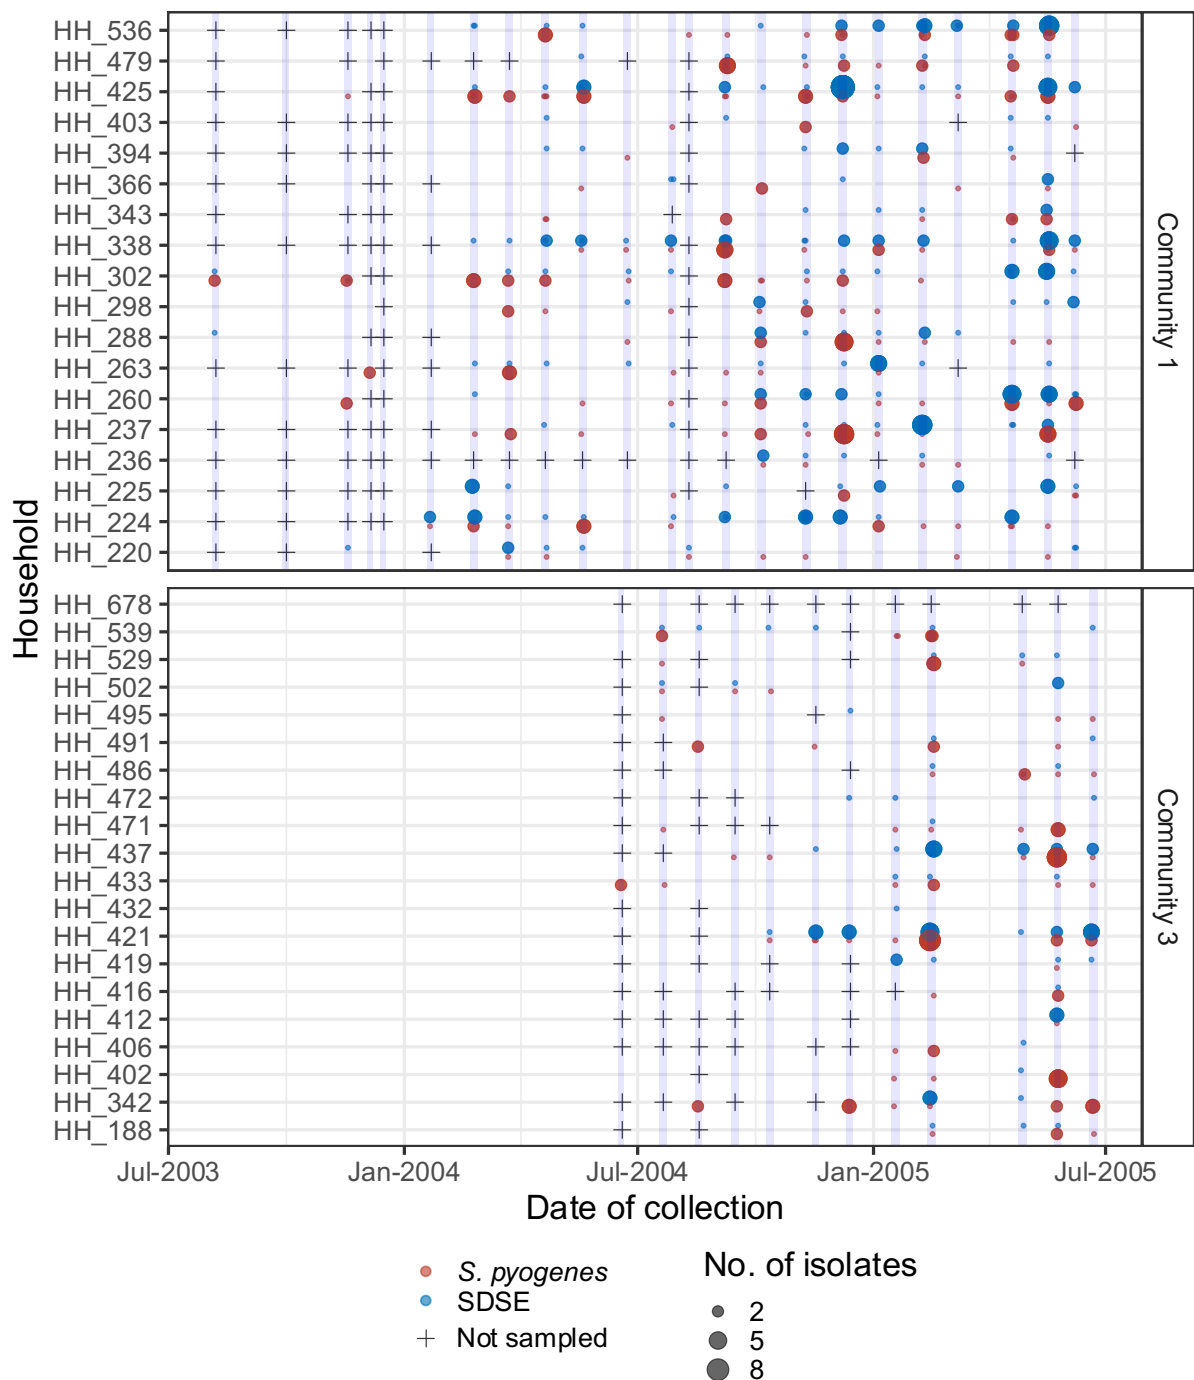

525

526 **Figure 4.** Co-occurrence of *Streptococcus dysgalactiae* subsp. *equisimilis* (SDSE) and *S.*  
527 *pyogenes* in households in communities 1 and 3 at each community visit (light blue highlights)  
528 during the study period. Detection of SDSE (blue) and *S. pyogenes* (red) are denoted by points  
529 with the size of each point proportional to the number of isolates. Community visits where a

530 household was not sampled are denoted by crosses. SDSE and *S. pyogenes* co-occurred on  
531 100/486 (21%) of household-visits.

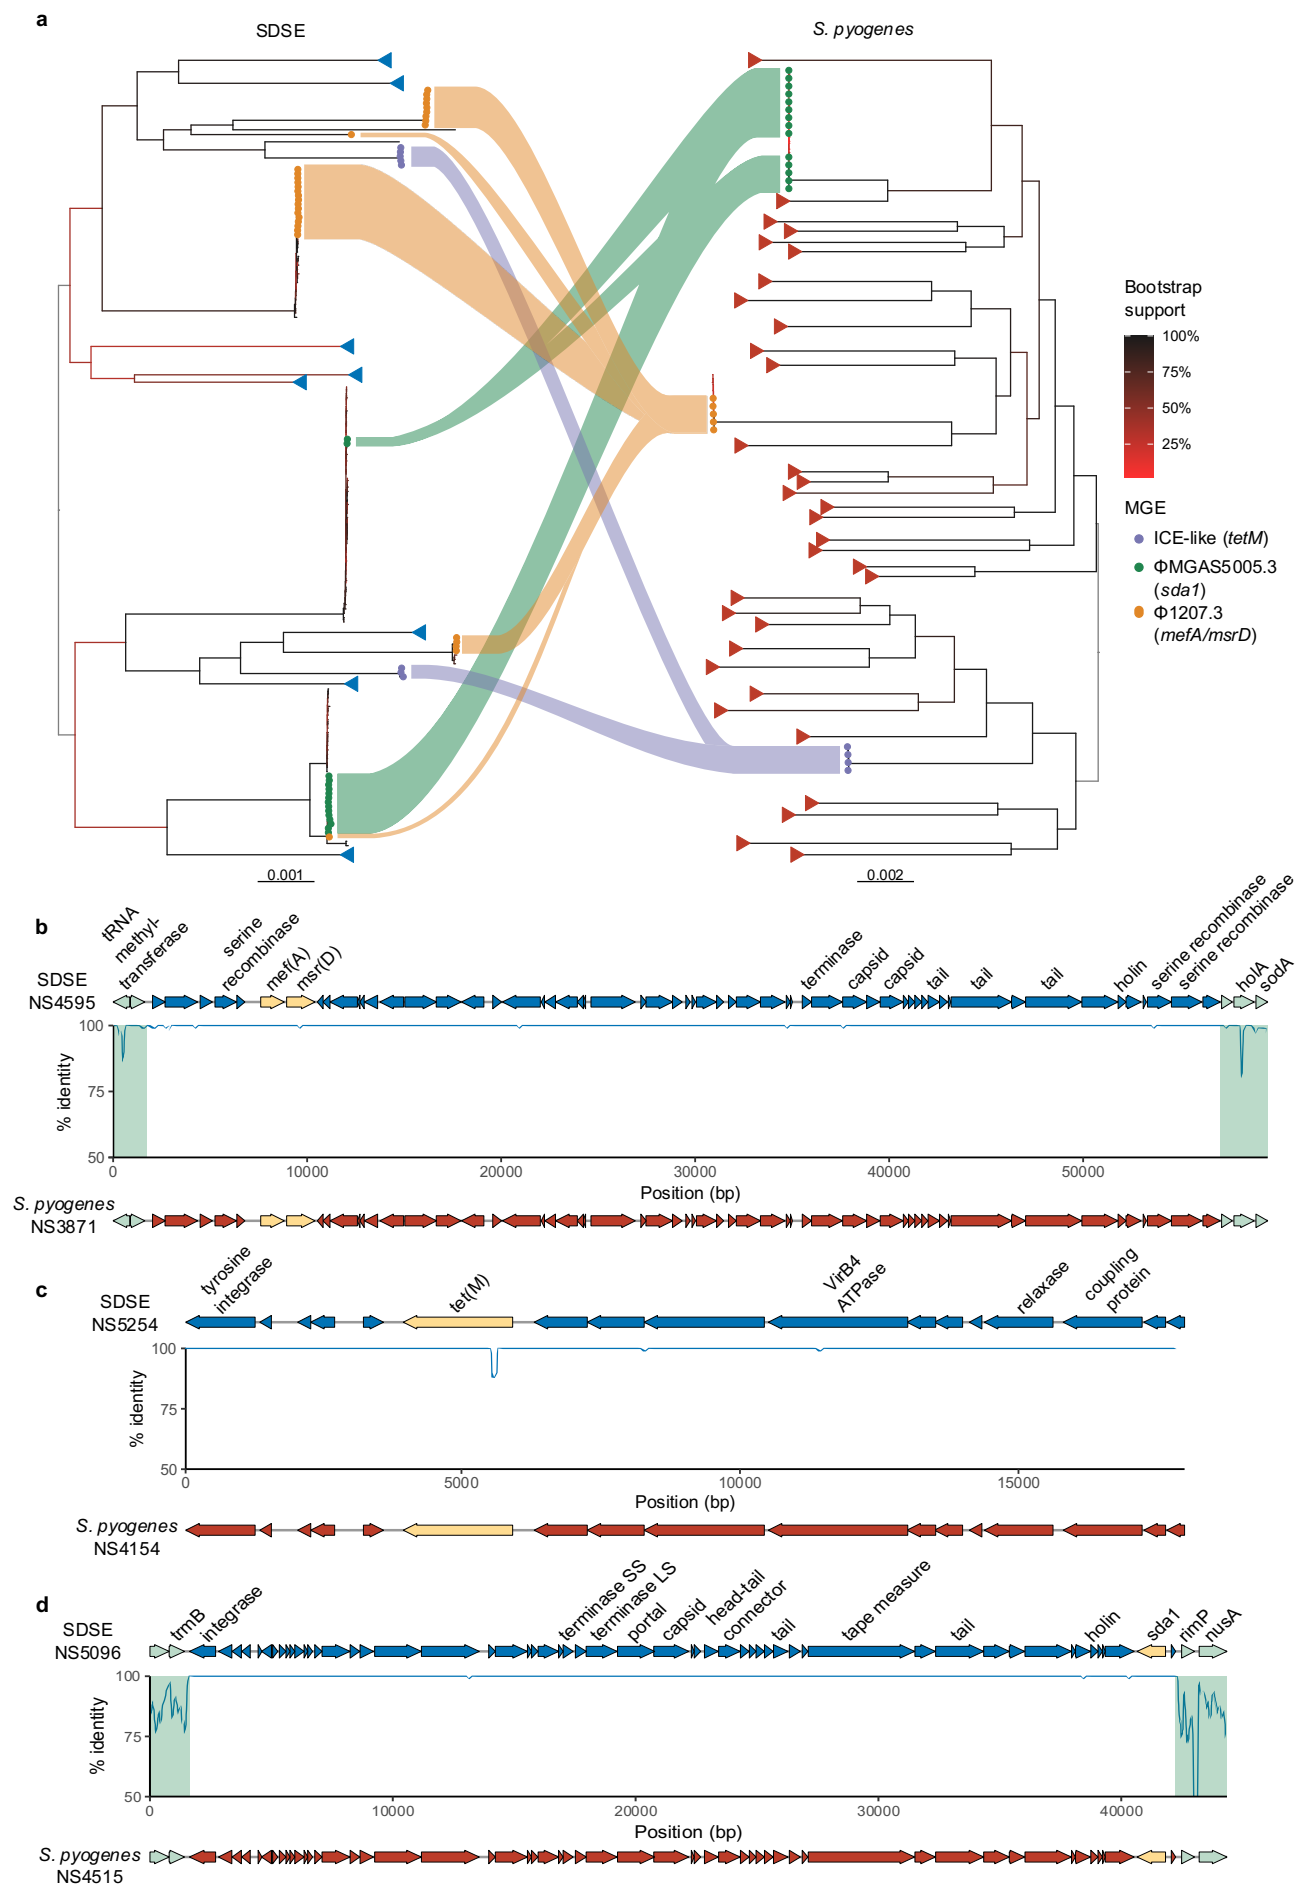

533 **Figure 5.** Shared mobile genetic elements (MGE) across *Streptococcus dysgalactiae* subsp.  
534 *equisimilis* (SDSE) and *Streptococcus pyogenes* isolates. **a)** Maximum likelihood trees of  
535 SDSE and *S. pyogenes* with isolates carrying three near-identical (>99% nucleotide identity)  
536 MGEs highlighted by tree tip points. Genomic sequence clusters without the three MGEs of  
537 interest are collapsed and denoted by blue (SDSE) and red (*S. pyogenes*) triangles at tree tips.  
538 Flows link corresponding shared MGEs across the species but do not imply directionality of  
539 transfer. Bootstrap supports are shown as branch colour gradients and were calculated using  
540 ultrafast bootstrap approximation<sup>30</sup>. **b)** A 54kbp prophage,  $\phi$ 1207.3, carrying macrolide efflux  
541 resistance genes *mef(A)* and *msr(D)* was present with >99.9% nucleotide identity across SDSE  
542 and *S. pyogenes*. A representative SDSE element from isolate NS4595 was aligned against a  
543 representative *S. pyogenes* sequence (NS3871) with percentage nucleotide identity calculated  
544 using Hamming distance and plotted in 100bp sliding windows. The element was present in a  
545 cross-species conserved insertion region with flanking core genes highlighted in green.  
546  $\phi$ 1207.3 was present in 5/8 *emm*58.8, MLST 549 *S. pyogenes* isolates with as few as 11 single  
547 nucleotide polymorphisms (SNPs) between isolates with and without the prophage. The same  
548 element was present in 31 SDSE isolates across subsets of five different lineages suggestive of  
549 recent gain/loss events of  $\phi$ 1207.3 in both the SDSE and *S. pyogenes* populations. **c)** An 18kbp  
550 integrative conjugative element (ICE)-like MGE carrying the tetracycline resistance gene,  
551 *tet(M)*, was present with >99.9% nucleotide identity in 4 *S. pyogenes* and 8 SDSE isolates,  
552 including two distinct SDSE populations. The element was present at three different genomic  
553 insertion regions and thus flanking core genes are not shown. In the example shown, a 12bp  
554 in-frame deletion was present at the 5' end of *tet(M)* in the SDSE element which was distant  
555 from the active ribosomal binding domain. **d)** A 41kbp prophage  $\phi$ MGAS5005.3 carrying the  
556 streptodornase gene *sda1*, was shared across species with >99.9% nucleotide identity at a cross-  
557 species conserved insertion region as has been described previously<sup>9</sup>.  $\phi$ MGAS5005.3 was

558 present in 14/16 *S. pyogenes emm1.0*, MLST 28 isolates with a maximum of 3 SNPs between  
559 isolates and 16 SDSE isolates across subsets of two different lineages.



## 560 **References**

- 561 1. Brandt CM, Spellerberg B. Human infections due to *Streptococcus dysgalactiae*  
562 subspecies *equisimilis*. *Clin Infect Dis* 2009; **49**: 766-72.
- 563 2. Haidan A, Talay SR, Rohde M et al. Pharyngeal carriage of group C and group G  
564 streptococci and acute rheumatic fever in an Aboriginal population. *Lancet* 2000; **356**: 1167-9.
- 565 3. Sikder S, Williams NL, Sorenson AE et al. Group G *Streptococcus* Induces an  
566 Autoimmune Carditis Mediated by Interleukin 17A and Interferon  $\gamma$  in the Lewis Rat Model of  
567 Rheumatic Heart Disease. *The Journal of Infectious Diseases* 2017; **218**: 324-35.
- 568 4. Oppegaard O, Glambek M, Skutlaberg DH et al. *Streptococcus dysgalactiae*  
569 Bloodstream Infections, Norway, 1999-2021. *Emerg Infect Dis* 2023; **29**: 260-7.
- 570 5. Wajima T, Morozumi M, Hanada S et al. Molecular Characterization of Invasive  
571 *Streptococcus dysgalactiae* subsp. *equisimilis*, Japan. *Emerg Infect Dis* 2016; **22**: 247-54.
- 572 6. Wright CM, Moorin R, Pearson G et al. Invasive Infections Caused by Lancefield  
573 Groups C/G and A *Streptococcus*, Western Australia, Australia, 2000-2018. *Emerg Infect Dis*  
574 2022; **28**: 2190-7.
- 575 7. McMillan DJ, Bessen DE, Pinho M et al. Population genetics of *Streptococcus*  
576 *dysgalactiae* subspecies *equisimilis* reveals widely dispersed clones and extensive  
577 recombination. *PLoS One* 2010; **5**: e11741.
- 578 8. McNeilly CL, McMillan DJ. Horizontal gene transfer and recombination in  
579 *Streptococcus dysgalactiae* subsp. *equisimilis*. *Front Microbiol* 2014; **5**: 676.
- 580 9. Xie O, Morris JM, Hayes AJ et al. Inter-species gene flow drives ongoing evolution of  
581 *Streptococcus pyogenes* and *Streptococcus dysgalactiae* subsp. *equisimilis*. *bioRxiv* 2023:  
582 2023.08.10.552873.
- 583 10. Belotserkovsky I, Baruch M, Peer A et al. Functional analysis of the quorum-sensing  
584 streptococcal invasion locus (*sil*). *PLoS Pathog* 2009; **5**: e1000651.

- 585 11. Armstrong BD, Herfst CA, Tonial NC et al. Identification of a two-component Class  
586 IIb bacteriocin in *Streptococcus pyogenes* by recombinase-based in vivo expression  
587 technology. *Sci Rep* 2016; **6**: 36233.
- 588 12. Heng NCK, Ragland NL, Swe PM et al. Dysgalacticin: a novel, plasmid-encoded  
589 antimicrobial protein (bacteriocin) produced by *Streptococcus dysgalactiae* subsp. *equisimilis*.  
590 *Microbiology (Reading)* 2006; **152**: 1991-2001.
- 591 13. Lacey JA, Marcato AJ, Chisholm RH et al. Evaluating the role of asymptomatic throat  
592 carriage of *Streptococcus pyogenes* in impetigo transmission in remote Aboriginal  
593 communities in Northern Territory, Australia: a retrospective genomic analysis. *Lancet*  
594 *Microbe* 2023.
- 595 14. McDonald M, Towers RJ, Andrews RM et al. Epidemiology of *Streptococcus*  
596 *dysgalactiae* subsp. *equisimilis* in tropical communities, Northern Australia. *Emerg Infect Dis*  
597 2007; **13**: 1694-700.
- 598 15. McDonald MI, Towers RJ, Andrews RM et al. Low rates of streptococcal pharyngitis  
599 and high rates of pyoderma in Australian aboriginal communities where acute rheumatic fever  
600 is hyperendemic. *Clin Infect Dis* 2006; **43**: 683-9.
- 601 16. Khedkar S, Smyshlyaev G, Letunic I et al. Landscape of mobile genetic elements and  
602 their antibiotic resistance cargo in prokaryotic genomes. *Nucleic Acids Research* 2022; **50**:  
603 3155-68.
- 604 17. Iannelli F, Santagati M, Santoro F et al. Nucleotide sequence of conjugative prophage  
605  $\Phi$ 1207.3 (formerly Tn1207.3) carrying the *mef(A)/msr(D)* genes for efflux resistance to  
606 macrolides in *Streptococcus pyogenes*. *Front Microbiol* 2014; **5**: 687.
- 607 18. Sumitomo T, Mori Y, Nakamura Y et al. Streptococcal Cysteine Protease-Mediated  
608 Cleavage of Desmogleins Is Involved in the Pathogenesis of Cutaneous Infection. *Front Cell*  
609 *Infect Microbiol* 2018; **8**: 10.

- 610 19. Steer AC, Jenney AW, Kado J et al. Prospective surveillance of streptococcal sore throat  
611 in a tropical country. *Pediatr Infect Dis J* 2009; **28**: 477-82.
- 612 20. Jose JJM, Brahmadathan KN, Abraham VJ et al. Streptococcal group A, C and G  
613 pharyngitis in school children: a prospective cohort study in Southern India. *Epidemiol Infect*  
614 2018; **146**: 848-53.
- 615 21. Turner JC, Hayden FG, Lobo MC et al. Epidemiologic evidence for Lancefield group  
616 C beta-hemolytic streptococci as a cause of exudative pharyngitis in college students. *J Clin*  
617 *Microbiol* 1997; **35**: 1-4.
- 618 22. Tonkin-Hill G, Ling C, Chaguza C et al. Pneumococcal within-host diversity during  
619 colonization, transmission and treatment. *Nat Microbiol* 2022; **7**: 1791-804.
- 620 23. Wood DE, Lu J, Langmead B. Improved metagenomic analysis with Kraken 2. *Genome*  
621 *Biol* 2019; **20**: 257.
- 622 24. Jolley KA, Bray JE, Maiden MCJ. Open-access bacterial population genomics: BIGSdb  
623 software, the PubMLST.org website and their applications. *Wellcome Open Res* 2018; **3**: 124.
- 624 25. Lees JA, Harris SR, Tonkin-Hill G et al. Fast and flexible bacterial genomic  
625 epidemiology with PopPUNK. *Genome Res* 2019; **29**: 304-16.
- 626 26. Davies MR, McIntyre L, Mutreja A et al. Atlas of group A streptococcal vaccine  
627 candidates compiled using large-scale comparative genomics. *Nature Genetics* 2019; **51**: 1035-  
628 43.
- 629 27. Tonkin-Hill G, MacAlasdair N, Ruis C et al. Producing polished prokaryotic  
630 pangenomes with the Panaroo pipeline. *Genome Biol* 2020; **21**: 180.
- 631 28. Jespersen MG, Hayes A, Davies MR. Corekiburra: pan-genome post-processing using  
632 core gene synteny. *Journal of Open Source Software* 2022; **7**: 4910.
- 633 29. Minh BQ, Schmidt HA, Chernomor O et al. IQ-TREE 2: New Models and Efficient  
634 Methods for Phylogenetic Inference in the Genomic Era. *Mol Biol Evol* 2020; **37**: 1530-4.

- 635 30. Hoang DT, Chernomor O, von Haeseler A et al. UFBoot2: Improving the Ultrafast  
636 Bootstrap Approximation. *Mol Biol Evol* 2018; **35**: 518-22.
- 637 31. Harris SR. SKA: Split Kmer Analysis Toolkit for Bacterial Genomic Epidemiology.  
638 *bioRxiv* 2018: 453142.
- 639 32. Higgs C, Sherry NL, Seemann T et al. Optimising genomic approaches for identifying  
640 vancomycin-resistant *Enterococcus faecium* transmission in healthcare settings. *Nat Commun*  
641 2022; **13**: 509.
- 642 33. Fu L, Niu B, Zhu Z et al. CD-HIT: accelerated for clustering the next-generation  
643 sequencing data. *Bioinformatics* 2012; **28**: 3150-2.
- 644 34. Li H. New strategies to improve minimap2 alignment accuracy. *Bioinformatics* 2021;  
645 **37**: 4572-4.
- 646
